# Supplementary material for: Health-related quality of life in adults with low-grade gliomas: a systematic review
Source: Qual Life Res. 2022 Aug 6;32(3):625–51. doi: 10.1007/s11136-022-03207-x (PMC9992080; doi:10.1007/s11136-022-03207-x)
Supplement: Supplementary file 2 — Supplementary file2 (XLSX 37 kb) [file 11136_2022_3207_MOESM2_ESM.xlsx]

## Sheet: HRQoL
Author and year	QoL outcome measure(s)	SF-36										EORTC QLQ-C30															EORTC QLQ-BN20											FACT-Br						Otherm
												Functioning						Symptoms
		Physical functioning	Role functioning - physical	Bodily pain	General health perception	Vitality	Social functioning	Role functioning - emotional	Mental health	Physical component	Mental component	Physical functioning	Role functioning	Emotional functioning	Cognitive functioning	Social functioning	Global score	Fatigue	Nausea/ vomiting	Pain	Dyspnoea	Insomnia	Appetite loss	Constipation	Diarrhoea	Financial difficulties	Future uncertainty	Visual disorder	Motor dysfunction	Communication deficit	Headache	Seizures	Drowsiness	Hair loss	Itchy skin	Leg weakness	Bladder control	Physical wellbeing	Social/family wellbeing	Emotional wellbeing	Functional wellbeing	Brain cancer subscale	Total	Physical	Psychological	Social	Emotional	Cognitive	Role
Aaronson (2011); Boele (2014); Boele (2015); Ediebah (2017)a	SF-36, QLQ-BN20	T1: 84.6 (20.5), NHL/CLL: 77 (22.8), NCC: 89.8 (14.2); T2: 77.88 (26.95)	T1: 64.9 (40), NHL/CLL: 58.3 (44), NCC: 82.0 (29.9); T2: 58.06 (42.89)	T1: 80.8 (24.5), NHL/CLL: 74.9(25.9), NCC: 73.5 (21.3); T2: 76.56 (25.31)	T1: 63.3(23.5), NHL/CLL: 52.9 (24.3), NCC: 73.8 (18.9); T2: 64.97 (22.65)	T1: 61.1 (19.8), NHL/CLL: 57.2 (21.7), NCC: 68.4 (18.2); T2: 59.31 (20.19)	T1: 78.4 (23.7), NHL/CLL: 75.4 (24.2), NCC: 84.5 (22.1); T2: 76.54 (23.54)	T1: 75.1 (36.4), NHL/CLL: 72.1 (38.9), NCC: 86.4 (28.7); T2: 71.43 (36.35)	T1: 73 (17.6), NHL/CLL: 71.7 (18.3), NCC: 76.6 (17.6); T2: 70.28 (18.68)	T1: 49.9 (9.1), NHL/CLL: 45.5 (10.6), NCC: 51.3 (7.9); T2: 46.91 (11.45)	T1: 46.1 (9.8), NHL/CLL: 46.2 (10.7), NCC: 49.9 (9.9); T2 = 47.87 (10.90)																T1: 24.1 (22.7), T2: 28.09 (21.99)	T1: 14.7 (21.5), T2: 14.87 (21)	T1: 13.3 (18), T2: 13.02 (15.66)	T1: 23.5 (24), T2: 20.34 (22.1)	T1: 21.13, T2: 25.64 (26.85)	T1: 13.81, T2: 16.15 (27.85)	T1: 17.26, T2: 23.08 (24.95)	T1: 7.81, T2: 4.1 (12.51)	T1: 9.01, T2: 13.33 (24.15)	T1: 4.46, T2: 8.21 (20.44)	T1: 5.95, T2: 8.72 (17.95)
Affronti (2018)b	FACT-Br, FACIT- Fatigue, FACT-Cog																																					T1: 21.95 (5.10); T2:23.07 (4.07); T3: 22.73 (6.50)	T1: 20.81 (5.17); T2: 20.88 (4.72); T3: 19.22 (4.66)	T1: 17.20 (5.5); T2: 15.64 (4.96); T3: 17.87 (5.36)	T1: 15.8 (6.65); T2: 16.29 (5.95); T3: 16.73 (6.86)	T1: 50.29 (14.58); T2: 49.96 (16.10); T3: 53.53 (16.59)	T1: 126.05 (31.8); T2: 125.84 (29.52); T3: 130.09 (35.62)	NR	NR	NR	NR	FACT-Cog: Perceived cognitive impairments: T1: 49.8 (18.04), T2: 48.64 (12.63), T3: 46.2 (19.27); Impact of perceived cog: T1: 8.33 (4.61), T2: 8.36 (4.43), T3: 9.13 (4.97); Comments from others: T1: 12.67 (4.7), T2: 13.71 (3.41), T3: 13.8 (4.31); Perceived cognitive abilities: T1: 15.73 (7.68), T2: 14.57 (6.66), T3: 15.53 (7.74)	NR
Budrukkar (2009)	QLQ-C30, BN20											81.3 (20.3), HGG: 76.6 (22.7), Benign: 83.5 (13.8)	78.6 (26), HGG: 74.5 (28.6), Benign: 82.6 (22.1)	70.6 (26.7), HGG: 61.4 (28.3), Benign: 69.6 (23.3)	73.7 (28.8), HGG: 67.6 (30.2), Benign: 69.6 (23.7)	69.9 (34.6), HGG: 69.2 (34.3), Benign: 77.4 (25.1)	61.9 (33.8), HGG: 51.7 (33.2), Benign: 60.6 (30.5)	37.7 (27.4), HGG: 44.4 (28.3), Benign: 32.9 (25.4)	11.7 (19.8), HGG: 16.2 (24.5), Benign: 14 (18.9)	27.2 (25.8), HGG: 39.4 (29.3), Benign: 26.8 (25.2)	10.3 (18.3), HGG: 11.1 (21.4), Benign: 9.2 (16.4)	19.7 (30.6), HGG: 25.7 (30.6), Benign: 20.4 (27.1)	27.7 (33.3), HGG: 31.5 (36.6), Benign: 23.5 (29.3)	15.5 (25.1), HGG: 21.1 (33.3), Benign: 11.1 (22.7)	NR	NR	17.9 (21.2), HGG: 23.1 (23.1), Benign: 16.8 (13.8)	17.6 (18.3), HGG: 20.7 (21.5), Benign: 14.6 (16.4)	25.7 (21.6), HGG: 32.9 (24.3), Benign: 25.1 (19.3)	28.9 (25.2), HGG: 34.9 (27.8), Benign: 25.5 (22.9)	21.6 (22.6), HGG: 24.5 (28.1), Benign: 15 (20.4)	27.1 (29.9), HGG: 38.2 (32), Benign: 23.5 (28.5)	12.3 (22.2), HGG: 18.5 (29.3), Benign: 17.4 (23.8)	15.5 (25.1), HGG: 21.1 (33.3), Benign: 11.1 (22.7)	2.9 (9.4), HGG: 5.6 (18.6), Benign: 1.9 (7.9)	NR	NR
Campanella (2017)	Psychological wellbeing scale																																												NRo
Correa (2007); Correa (2008)c	FACT-Br																																					NR	NR	NR	NR	NR	T1: Treated: 145 (25.6), Untreated: 142 (25.3); T2: NR; T3: NR
Drewes (2018)d	EQ-5D																																											NR	NR	NR	NR	NR	NR
Gabel (2019)	NIH-PROMIS, Neuro QoL																																											PROMIS: function: 47.7 (12.2), HGG: 41.8 (12.6); pain interferences: 52.8 (10.4), HGG: 49.3 (9.8); pain intensity: 3.3 (3), HGG: 1.8 (2)	PROMIS: anxiety: 51.5 (8.8), HGG: 54.3 (10.4); depression: 47.2 (11.4), HGG: 49.1 (10)	PROMIS: ability to participate in social role and activities: 50.7(10.4); HGG: 47.2 (11.4)	Neuro-QoL: emotional and behavioural dyscontrol: 46.9 (12.8); HGG: 46.7 (9.9)	Neuro-QoL: 47.9 (9.3); HGG: 44 (11.6)	See social
Gustafsson (2006)	QLQ-C30											82.6 (27.6)	71.1 (32.1)	73.4 (20.5)	71.2 (23.5)	77.5 (33)	65.1 (21)	29.5 (26.3)	2.2 (6.9)	21.9 (27.7)	21.9(29.3)	26.3 (29.2)	7 (17.6)	8.8 (18.5)	4.4 (13.8)	15.3 (27.9)
Jakola (2012)	QLQ-C30, BN20, EQ-5D											NR	NR	NR	Non-eloquent: 68, Eloquent: 69	NR	Non-eloquent: 72, Eloquent: 74	Non-eloquent: 31, Eloquent: 33	NR	NR	NR	NR	NR	NR	NR	NR	23	12	22	20	NR	NR	NR	NR	NR	NR	NR							NR	NR	NR	NR	NR	NR
Jiang (2019)	SF-36	65.3 (25.7), PTSD: 56.4 (21.5), Non: 67 (26.1)	53.2 (32.1), PTSD: 32.9 (24.1), Non: 57.1 (32)	55.6 (27.7), PTSD: 35.6 (17.2), Non: 59.4 (27.8)	50.2 (19.9), PTSD: 38.4 (16.5), Non: 52.4 (19.8)	53.3 (20.5), PTSD: 41.7 (16.3), Non: 55.3 (20.6)	60.2 (26.7), PTSD: 42.9 (21.9), Non: 63.5 (26)	58.4 (20.5), PTSD: 38.4 (14.8), Non: 62.1 (18.8)	55.7 (30.6), PTSD: 39 (24.9), Non: 60.1 (30.4)	NR	NR
Kim (2020)	FACT-G																																											NRn	NR	NRn	NRn	NR	NRn
Klein (2003)e, k	SF-36	NR	NR	NR	NR	NR	NR	NR	NR	L1 (54.5); L2 (48.2); L3 (50.1); L4 (49.5); L5 (42.5); L6 (44.3)	L1 (52.5), L2 (51.2), L3 (51), L4 (48.5), L5 (43.7), L6 (46)
Leonetti (2021)f, l	SF-36	NR	NR	NR	NR	NR	NR	NR	NR	T0: 60%, HGG: 70%; T1: 84%, HGG: 80%; T2: 68%, HGG: 72%; T3: 60%, HGG: 77%; T4: 30%, HGG: 46%	T0: 60%, HGG: 70%; T1: 80%, HGG: 78%; T2: 63%, HGG: 65%; T3: 55%, HGG: 63%; T4: 24%, HGG: 46%
Mahalakshmi (2015)	QLQ-C30, BN20											82.6; HGG: 64.3	80.2; HGG: 58.9	76.9; HGG: 69	76.7; HGG: 71.2	78.3; HGG: 60.2	62.1; HGG: 44	20.4; HGG: 41.4	12.3; HGG: 22.6	16.4; HGG: 30.2	22.1; HGG: 30.7	NR	26.9; HGG: 31.7	NR	NR	50.4; HGG: 32.6	21.2 (19.1); HGG: 25.2 (15.2)	16.7 (18.3); HGG: 22.1 (21.5)	22.9 (21.6); HGG: 38.7 (24.3)	22.1 (26.2); HGG: 38.9 (26.4)	19.6 (22.6); HGG: 22.5 (24.1)	18.4 (22.2); HGG: 21.5 (29.3)	15.5 (25.1); HGG: 21.1 (33.3)	12.8 (29.9); HGG: 32.2 (32)	2.45 (9.4); HGG: 6.21 (18.6)	NR	NR
Okita (2015)g	QLQ-C30, BN20											G1: 92.4 (20.5); G2: 91.9 (18.7); G3: 76 (28.1)	G1: 84.1 (27.1); G2: 83.3 (31.9); G3: 81.7 (33.8)	G1: 78.6 (23.5); G2: 86.8 (18.3); G3: 86.7 (13.2)	G1: 76.2 (24.5); G2: 77.2 (22.4); G3: 81.7 (21.4)	G1: 82.5 (29.1); G2: 84.2 (25.7); G3: 85 (30.9)	G1: 65.9 (26.5); G2: 72.8 (21.8); G3: 60.8 (16.2)	G1: 34.4 (28.1); G2: 26.9 (23.5); G3: 34.4 (29.4)	G1: 8.7 (14.6); G2: 3.5 (11.9); G3: 0 (0)	G1: 11.9 (16.8); G2: 4.4 (9.4); G3: 5 (15.8)	G1: 14.3 (24.9); G2: 5.3 (12.5); G3: 0 (0)	G1: 15.9 (27.1); G2: 15.8 (28); G3: 10 (16.1)	G1: 11.1 (24.3); G2: 5.3 (12.5); G3: 3.3 (10.5)	G1: 7.9 (14.6); G2: 7 (17.8); G3: 23.3 (35.3)	G1: 11.1 (24.3); G2: 12.3 (16.5); G3: 10 (16.1)	G1: 17.5 (31); G2: 19.3 (27.9); G3: 10 (16.1)	G1: 27.4 (24); G2: 16.7 (20.8); G3: 19.2 (18.5)	G1: 7.4 (14.2); G2: 8.8 (21.5); G3: 8.9 (12.6)	G1: 12.2 (18.2); G2: 10.5 (16.3); G3: 10 (11.1)	G1: 16.4 (28); G2: 15.8 (22.6); G3: 27.8 (30.2)	G1: 20.6 (22.3); G2: 12.3 (16.5); G3: 13.3 (17.2)	G1: 3.2 (10); G2: 1.8 (7.7); G3: 3.3 (10.5)	G1: 31.8 (32.5); G2: 28.1 (31.9); G3: 40 (30.6)	G1: 7.9 (18); G2: 8.8 (18.7); G3: 10 (31.6)	G1: 12.7 (26.8); G2: 8.8 (18.7); G3: 3.3 (10.5)	G1: 11.1 (26.5); G2: 17.5 (23.2); G3: 30 (39.9)	G1: 3.2 (10); G2: 15.8 (32.1); G3: 26.7 (34.4)
Reijneveld (2001)k	SF-36, BN20	90; S-LGG: 89; NCC: 93	66; S-LGG: 74; NCC: 87	82.5; S-LGG: 87; NCC: 83	61.5; S-LGG: 65; NCC: 78	58; S-LGG: 71.5; NCC: 74.5	74.5; S-LGG: 86.5; NCC: 92.5	68; S-LGG: 79; NCC: 87	70; S-LGG: 75; NCC: 81.5	NR	NR																21.5; S-LGG: 24.5	10.5; S-LGG: 6.5	15; S-LGG: 3.5	20.5; S-LGG: 14	23; S-LGG: 29	25.5; S-LGG: 15.5	18.5; S-LGG: 14	4.5; S-LGG: 4.5	8.5; S-LGG: 10	4.5; S-LGG: 1.5	8.5; S-LGG: 0
Ruge (2011)	SF-36	91.7 (12.9); NCC: 85.7 (22.1)	71.2 (36); NCC: 83.7 (31.7)	82.7 (23.4); NCC: 79.1 (27.4)	56.1 (17); NCC: 68.1 (20.1)	60.2 (23.1); NCC: 63.3 (18.5)	73.1 (28.1); NCC: 88.8 (18.4)	77.8 (34); NCC: 90.4 (25.6)	63 (19.4); NCC: 73.9 (16.3)	NR	NR
Salo (2002); Mainio (2006)	Sin-tonen’s 15D NHP																																											NR	NR	NR	NR	NR	NR
Teng (2021)	QLQ-C30											87.1; NCC: 91	76.8; NCC: 88.1	71.5; NCC: 83.2	69.7; NCC: 90.5	71.5; NCC: 91.5	69.1; NCC: 75.7	NR	NR	NR	NR	NR	NR	NR	NR	NR
Umezaki (2020)	QLQ-C30, BN20											83.4; HGG: 77.8	80.1; HGG: 78.1	82.5; HGG: 82.4	78; HGG: 70	75.3; HGG: 72.2	65.8; HGG: 62.2	31.9; HGG: 33.7	2.2; HGG: 4.1	9.7; HGG: 11.5	7.5; HGG: 5.2	18.3; HGG: 21.5	10.7; HGG: 16.3	10.7; HGG: 25.9	8.6; HGG: 11.1	22.6; HGG: 30.4	24.5; HGG: 28.7	10.4; HGG: 13.1	15.9; HGG: 12.8	19.3; HGG: 29.4	18.3; HGG: 14.8	7.5; HGG: 1.5	32.2; HGG: 39.3	10.7; HGG: 24.4	9.7; HGG: 20.7	25.8; HGG: 28.9	8.6; HGG: 13.3
Wang (2018); Li (2019a); Li (2019b)h	FACT-Br																																					T1: 20.94 (4.32); T2: 20.99 (4.17)	T1: 23.36 (3.6); T2: 23.49 (3.59)	T1: 17.7 (3.73); T2: 18.97 (3.21)	T1: 17.27 (4.25); T2: 18.65 (3.55)	T1: 54.15 (11.22); T2: 56.52 (9.16)	T1: 133.57 (16.24); T2: 138.62 (13.37)
Yavas (2012)i, j	QLQ-C30, BN20											T1: 93.3 (86.7-100); T2: 93.3 (86.7-100); T3: 93.3 (80-100); T4: 93.3 (80-100); T5: 93.3 (75-100); T6: 93.3 (75-100); T7: 100 (75-100); T8: 100 (83.3-100)	T1: 100 (83.3-100); T2: 100 (66.7-100); T3: 100 (83.3-100); T4: 100 (66.7-100); T5: 100 (75-100); T6: 100 (75-100); T7: 100 (81.2-100); T8: 100 (83.3-100)	T1: 83.3 (66.7-91.7); T2: 75 (66.7-100); T3: 75 (56.2-100); T4: 75 (50-100); T5: 75 (58.3-93.3); T6: 75 (58.3-93.3); T7: 75 (62.5-100); T8: 83.3 (66.7-100)	T1: 83.3 (66.7-83.3); T2: 66.7 (50-83.3); T3: 58.3 (50-83.3); T4: 66.7 (50-83.3); T5: 50 (33.3-83.3); T6: 50 (33.3-83.3); T7: 58.3 (33.3-83.3); T8: 75 (41.7-83.3)	T1: 83.3 (66.7-100); T2: 83.3 (66.7-100); T3: 75 (66.7-100); T4: 83.3 (66.7-100); T5: 83.3 (66.7-93.3); T6: 75 (66.7-93.3); T7: 75 (66.7-100); T8: 83.3 (66.7-100)	T1: 66.7 (58.3-91.7); T2: 75 (58.3-83.3); T3: 75 (50-83.3); T4: 75 (50-83.3); T5: 75 (70.8-83.3); T6: 75 (70.8-83.3); T7: 75 (73-83.3); T8: 83.3 (75-92.5)	T1: 22.2 (11.1-33.3); T2: 22.2 (11.1-33.3); T3: 33.3 (11.1-44.4); T4: 33.3 (11.1-55.6); T5: 33.3 (11.1-33.3); T6: 22.2 (11.1-33.3); T7: 33.3 (11.1-55.6); T8: 11.1 (0-38.9)	T1: 0 (0-0); T2: 0 (0-0); T3: 0 (0-0); T4: 0 (0-0); T5: 0 (0-0); T6: 0 (0-0); T7: 0 (0-0); T8: 0 (0-0)	T1: 16.7 (0-16.7); T2: 0 (0-16.7); T3: 0 (0-16.7); T4: 0 (0-16.7); T5: 0 (0-11.1); T6: 0 (0-11.1); T7: 0 (0-11.1); T8: 0 (0-11.1)	T1: 0 (0-0); T2: 0 (0-0); T3: 0 (0-0); T4: 0 (0-0); T5: 0 (0-0); T6: 0 (0-0); T7: 0 (0-0); T8: 0 (0-0)	T1: 0 (0-33.3); T2: 33.3 (0-33.3); T3: 33.3 (0-33.3); T4: 33.3 (0-33.3); T5: 11.1 (0-33.3); T6: 11.1 (0-33.3); T7: 27.8 (0-33.3); T8: 0 (0-33.3)	T1: 0 (0-33.3); T2: 0 (0-33.3); T3: 0 (0-33.3); T4: 0 (0-33.3); T5: 0 (0-33.3); T6: 11.1 (0-33.3); T7: 0 (0-16.7); T8: 0 (0-0)	T1: 0 (0-0); T2: 0 (0-0); T3: 0 (0-0); T4: 0 (0-0); T5: 0 (0-0); T6: 0 (0-0); T7: 0 (0-0); T8: 0 (0-0)	T1: 0 (0-0); T2: 0 (0-0); T3: 0 (0-0); T4: 0 (0-0); T5: 0 (0-0); T6: 0 (0-0); T7: 0 (0-0); T8: 11.1 (0-0)	T1: 0 (0-33.3); T2: 0 (0-33.3); T3: 16.7 (0-33.3); T4: 0 (0-33.3); T5: 33.3 (0-33.3); T6: 16.7 (0-33.3); T7: 33.3 (0-33.3); T8: 33.3 (0-33.3)	T1: 16.7 (8.3-25); T2: 16.7 (0-25); T3: 16.7 (0-25); T4: 16.7 (0-25); T5: 8.3 (0-16.7); T6: 8.3 (0-16.7); T7: 11.1 (0-18.7); T8: 0 (0-20.8)	T1: 0 (0-0); T2: 0 (0-0); T3: 0 (0-0); T4: 0 (0-0); T5: 0 (0-0); T6: 0 (0-0); T7: 0 (0-0); T8: 0 (0-0)	T1: 0 (0-11.1); T2: 0 (0-11.1); T3: 0 (0-11.1); T4: 0 (0-0); T5: 0 (0-0); T6: 0 (0-0); T7: 0 (0-0); T8: 0 (0-0)	T1: 11.1 (0-22.2); T2: 11.1 (0-22.2); T3: 5.5 (0-22.2); T4: 0 (0-11.1); T5: 0 (0-11.1); T6: 0 (0-11.1); T7: 0 (0-11.1); T8: 0 (0-11.1)	T1: 33.3 (0-33.3); T2: 0 (0-33.3); T3: 0 (0-33.3); T4: 0 (0-33.3); T5: 0 (0-0); T6: 0 (0-0); T7: 0 (0-2.8); T8: 0 (0-0)	T1: 0 (0-33.3); T2: 0 (0-33.3); T3: 0 (0-0); T4: 0 (0-11.1); T5: 0 (0-0); T6: 0 (0-11.1); T7: 0 (0-11.1); T8: 0 (0-0)	T1: 33.3 (0-33.3); T2: 33.3 (0-33.3); T3: 0 (0-33.3); T4: 0 (0-0); T5: 0 (0-33.3); T6: 0 (0-0); T7: 0 (0-24.9); T8: 0 (0-0)	T1: 0 (0-0); T2: 33.3 (0-33.3); T3: 33.3 (0-33.3); T4: 0 (0-33.3); T5: 0 (0-33.3); T6: 0 (0-0); T7: 0 (0-0); T8: 0 (0-0)	T1: 0 (0-33.3); T2: 0 (0-0); T3: 0 (0-0); T4: 0 (0-0); T5: 0 (0-0); T6: 0 (0-0); T7: 0 (0-0); T8: 0 (0-0)	T1: 0 (0-0); T2: 0 (0-0); T3: 0 (0-0); T4: 0 (0-0); T5: 0 (0-0); T6: 0 (0-0); T7: 0 (0-0); T8: 0 (0-0)	T1: 0 (0-0); T2: 0 (0-0); T3: 0 (0-0); T4: 0 (0-0); T5: 0 (0-0); T6: 0 (0-0); T7: 0 (0-0); T8: 0 (0-0)
Abbreviations: G = group; HGG = high-grade glioma; L = level; NCC = non-cancer control; NHL/CLL = non-Hodgkin's lymphoma/chronic lymphocytic leukaemia; NR = Not reported; PTSD = post-traumatic stress disorder; S-LGG = suspected low-grade glioma; T = timepoint
aT1 = mean 6 years, T2 = mean 12 years since diagnosis
bT1 = 2 months, T2 = 4 months, T3 = 6 months since diagnosis
cT1 = baseline, T2 = 6 months, T3 = 12 months follow-up
dT1 = 1 month, T2 = 6 months since treatment
eSample stratified into six levels of epilepsy burden (level 1 = epilepsy free – level 6 = >6 seizures in the last year)
fT0 = 1-week before surgery, T1 = 1-month, T2 = 3-months, T3 = 6-months, T4 = 12-months since surgery
gG1 = 0-4 years, G2 = 5-9 years, G3 = 10-20 years since treatment
hT1 = 1 month, T2 = 1 year since treatment
iT1 = baseline, T2 = 1-3 months, T3 = 6 months, T4 = 12 months, T5 = 18 months, T6 = 24 months, T7 = 30 months, T8 = 36 months since treatment
jFindings reported as medians and inter-quartile ranges
kMean results interpreted from figures.
lReported as prevalence of people with low scores (one SD below average score of control group)
mOther instruments: EQ-5D; FACIT-fatigue; FACT-Cog; SQoL; NIH-PROMIS; NeuroQoL; Sin-Tonen’s 15D.
nFindings not reported separately for LGGs.
oFindings reported as Z values, so raw scores were not available.
[truncated: 2 more columns]

## Sheet: HRQoL_grouped
Author and year	SF-36
	Physical functioning	Role functioning - physical	Bodily pain	General health perception	Vitality	Social functioning	Role functioning - emotional	Mental health	Physical component	Mental component
Aaronson (2011); Boele (2014); Boele (2015); Ediebah (2017)a	T1: 84.6 (20.5), NHL/CLL: 77 (22.8), NCC: 89.8 (14.2); T2: 77.88 (26.95)	T1: 64.9 (40), NHL/CLL: 58.3 (44), NCC: 82.0 (29.9); T2: 58.06 (42.89)	T1: 80.8 (24.5), NHL/CLL: 74.9(25.9), NCC: 73.5 (21.3); T2: 76.56 (25.31)	T1: 63.3(23.5), NHL/CLL: 52.9 (24.3), NCC: 73.8 (18.9); T2: 64.97 (22.65)	T1: 61.1 (19.8), NHL/CLL: 57.2 (21.7), NCC: 68.4 (18.2); T2: 59.31 (20.19)	T1: 78.4 (23.7), NHL/CLL: 75.4 (24.2), NCC: 84.5 (22.1); T2: 76.54 (23.54)	T1: 75.1 (36.4), NHL/CLL: 72.1 (38.9), NCC: 86.4 (28.7); T2: 71.43 (36.35)	T1: 73 (17.6), NHL/CLL: 71.7 (18.3), NCC: 76.6 (17.6); T2: 70.28 (18.68)	T1: 49.9 (9.1), NHL/CLL: 45.5 (10.6), NCC: 51.3 (7.9); T2: 46.91 (11.45)	T1: 46.1 (9.8), NHL/CLL: 46.2 (10.7), NCC: 49.9 (9.9); T2 = 47.87 (10.90)
Jiang (2019)	65.3 (25.7), PTSD: 56.4 (21.5), Non: 67 (26.1)	53.2 (32.1), PTSD: 32.9 (24.1), Non: 57.1 (32)	55.6 (27.7), PTSD: 35.6 (17.2), Non: 59.4 (27.8)	50.2 (19.9), PTSD: 38.4 (16.5), Non: 52.4 (19.8)	53.3 (20.5), PTSD: 41.7 (16.3), Non: 55.3 (20.6)	60.2 (26.7), PTSD: 42.9 (21.9), Non: 63.5 (26)	58.4 (20.5), PTSD: 38.4 (14.8), Non: 62.1 (18.8)	55.7 (30.6), PTSD: 39 (24.9), Non: 60.1 (30.4)	NR	NR
Klein (2003)e, k	NR	NR	NR	NR	NR	NR	NR	NR	L1 (54.5); L2 (48.2); L3 (50.1); L4 (49.5); L5 (42.5); L6 (44.3)	L1 (52.5), L2 (51.2), L3 (51), L4 (48.5), L5 (43.7), L6 (46)
Leonetti (2021)f, l	NR	NR	NR	NR	NR	NR	NR	NR	T0: 60%, HGG: 70%; T1: 84%, HGG: 80%; T2: 68%, HGG: 72%; T3: 60%, HGG: 77%; T4: 30%, HGG: 46%	T0: 60%, HGG: 70%; T1: 80%, HGG: 78%; T2: 63%, HGG: 65%; T3: 55%, HGG: 63%; T4: 24%, HGG: 46%
Reijneveld (2001)k	90; S-LGG: 89; NCC: 93	66; S-LGG: 74; NCC: 87	82.5; S-LGG: 87; NCC: 83	61.5; S-LGG: 65; NCC: 78	58; S-LGG: 71.5; NCC: 74.5	74.5; S-LGG: 86.5; NCC: 92.5	68; S-LGG: 79; NCC: 87	70; S-LGG: 75; NCC: 81.5	NR	NR
Ruge (2011)	91.7 (12.9); NCC: 85.7 (22.1)	71.2 (36); NCC: 83.7 (31.7)	82.7 (23.4); NCC: 79.1 (27.4)	56.1 (17); NCC: 68.1 (20.1)	60.2 (23.1); NCC: 63.3 (18.5)	73.1 (28.1); NCC: 88.8 (18.4)	77.8 (34); NCC: 90.4 (25.6)	63 (19.4); NCC: 73.9 (16.3)	NR	NR
Author and year	EORTC QLQ-C30
	Functioning						Symptoms
	Physical functioning	Role functioning	Emotional functioning	Cognitive functioning	Social functioning	Global score	Fatigue	Nausea/ vomiting	Pain	Dyspnoea	Insomnia	Appetite loss	Constipation	Diarrhoea	Financial difficulties
Budrukkar (2009)	81.3 (20.3), HGG: 76.6 (22.7), Benign: 83.5 (13.8)	78.6 (26), HGG: 74.5 (28.6), Benign: 82.6 (22.1)	70.6 (26.7), HGG: 61.4 (28.3), Benign: 69.6 (23.3)	73.7 (28.8), HGG: 67.6 (30.2), Benign: 69.6 (23.7)	69.9 (34.6), HGG: 69.2 (34.3), Benign: 77.4 (25.1)	61.9 (33.8), HGG: 51.7 (33.2), Benign: 60.6 (30.5)	37.7 (27.4), HGG: 44.4 (28.3), Benign: 32.9 (25.4)	11.7 (19.8), HGG: 16.2 (24.5), Benign: 14 (18.9)	27.2 (25.8), HGG: 39.4 (29.3), Benign: 26.8 (25.2)	10.3 (18.3), HGG: 11.1 (21.4), Benign: 9.2 (16.4)	19.7 (30.6), HGG: 25.7 (30.6), Benign: 20.4 (27.1)	27.7 (33.3), HGG: 31.5 (36.6), Benign: 23.5 (29.3)	15.5 (25.1), HGG: 21.1 (33.3), Benign: 11.1 (22.7)	NR	NR
Gustafsson (2006)	82.6 (27.6)	71.1 (32.1)	73.4 (20.5)	71.2 (23.5)	77.5 (33)	65.1 (21)	29.5 (26.3)	2.2 (6.9)	21.9 (27.7)	21.9(29.3)	26.3 (29.2)	7 (17.6)	8.8 (18.5)	4.4 (13.8)	15.3 (27.9)
Jakola (2012)	NR	NR	NR	Non-eloquent: 68, Eloquent: 69	NR	Non-eloquent: 72, Eloquent: 74	Non-eloquent: 31, Eloquent: 33	NR	NR	NR	NR	NR	NR	NR	NR
Mahalakshmi (2015)	82.6; HGG: 64.3	80.2; HGG: 58.9	76.9; HGG: 69	76.7; HGG: 71.2	78.3; HGG: 60.2	62.1; HGG: 44	20.4; HGG: 41.4	12.3; HGG: 22.6	16.4; HGG: 30.2	22.1; HGG: 30.7	NR	26.9; HGG: 31.7	NR	NR	50.4; HGG: 32.6
Okita (2015)g	G1: 92.4 (20.5); G2: 91.9 (18.7); G3: 76 (28.1)	G1: 84.1 (27.1); G2: 83.3 (31.9); G3: 81.7 (33.8)	G1: 78.6 (23.5); G2: 86.8 (18.3); G3: 86.7 (13.2)	G1: 76.2 (24.5); G2: 77.2 (22.4); G3: 81.7 (21.4)	G1: 82.5 (29.1); G2: 84.2 (25.7); G3: 85 (30.9)	G1: 65.9 (26.5); G2: 72.8 (21.8); G3: 60.8 (16.2)	G1: 34.4 (28.1); G2: 26.9 (23.5); G3: 34.4 (29.4)	G1: 8.7 (14.6); G2: 3.5 (11.9); G3: 0 (0)	G1: 11.9 (16.8); G2: 4.4 (9.4); G3: 5 (15.8)	G1: 14.3 (24.9); G2: 5.3 (12.5); G3: 0 (0)	G1: 15.9 (27.1); G2: 15.8 (28); G3: 10 (16.1)	G1: 11.1 (24.3); G2: 5.3 (12.5); G3: 3.3 (10.5)	G1: 7.9 (14.6); G2: 7 (17.8); G3: 23.3 (35.3)	G1: 11.1 (24.3); G2: 12.3 (16.5); G3: 10 (16.1)	G1: 17.5 (31); G2: 19.3 (27.9); G3: 10 (16.1)
Teng (2021)	87.1; NCC: 91	76.8; NCC: 88.1	71.5; NCC: 83.2	69.7; NCC: 90.5	71.5; NCC: 91.5	69.1; NCC: 75.7	NR	NR	NR	NR	NR	NR	NR	NR	NR
Umezaki (2020)	83.4; HGG: 77.8	80.1; HGG: 78.1	82.5; HGG: 82.4	78; HGG: 70	75.3; HGG: 72.2	65.8; HGG: 62.2	31.9; HGG: 33.7	2.2; HGG: 4.1	9.7; HGG: 11.5	7.5; HGG: 5.2	18.3; HGG: 21.5	10.7; HGG: 16.3	10.7; HGG: 25.9	8.6; HGG: 11.1	22.6; HGG: 30.4
Yavas (2012)i, j	T1: 93.3 (86.7-100); T2: 93.3 (86.7-100); T3: 93.3 (80-100); T4: 93.3 (80-100); T5: 93.3 (75-100); T6: 93.3 (75-100); T7: 100 (75-100); T8: 100 (83.3-100)	T1: 100 (83.3-100); T2: 100 (66.7-100); T3: 100 (83.3-100); T4: 100 (66.7-100); T5: 100 (75-100); T6: 100 (75-100); T7: 100 (81.2-100); T8: 100 (83.3-100)	T1: 83.3 (66.7-91.7); T2: 75 (66.7-100); T3: 75 (56.2-100); T4: 75 (50-100); T5: 75 (58.3-93.3); T6: 75 (58.3-93.3); T7: 75 (62.5-100); T8: 83.3 (66.7-100)	T1: 83.3 (66.7-83.3); T2: 66.7 (50-83.3); T3: 58.3 (50-83.3); T4: 66.7 (50-83.3); T5: 50 (33.3-83.3); T6: 50 (33.3-83.3); T7: 58.3 (33.3-83.3); T8: 75 (41.7-83.3)	T1: 83.3 (66.7-100); T2: 83.3 (66.7-100); T3: 75 (66.7-100); T4: 83.3 (66.7-100); T5: 83.3 (66.7-93.3); T6: 75 (66.7-93.3); T7: 75 (66.7-100); T8: 83.3 (66.7-100)	T1: 66.7 (58.3-91.7); T2: 75 (58.3-83.3); T3: 75 (50-83.3); T4: 75 (50-83.3); T5: 75 (70.8-83.3); T6: 75 (70.8-83.3); T7: 75 (73-83.3); T8: 83.3 (75-92.5)	T1: 22.2 (11.1-33.3); T2: 22.2 (11.1-33.3); T3: 33.3 (11.1-44.4); T4: 33.3 (11.1-55.6); T5: 33.3 (11.1-33.3); T6: 22.2 (11.1-33.3); T7: 33.3 (11.1-55.6); T8: 11.1 (0-38.9)	T1: 0 (0-0); T2: 0 (0-0); T3: 0 (0-0); T4: 0 (0-0); T5: 0 (0-0); T6: 0 (0-0); T7: 0 (0-0); T8: 0 (0-0)	T1: 16.7 (0-16.7); T2: 0 (0-16.7); T3: 0 (0-16.7); T4: 0 (0-16.7); T5: 0 (0-11.1); T6: 0 (0-11.1); T7: 0 (0-11.1); T8: 0 (0-11.1)	T1: 0 (0-0); T2: 0 (0-0); T3: 0 (0-0); T4: 0 (0-0); T5: 0 (0-0); T6: 0 (0-0); T7: 0 (0-0); T8: 0 (0-0)	T1: 0 (0-33.3); T2: 33.3 (0-33.3); T3: 33.3 (0-33.3); T4: 33.3 (0-33.3); T5: 11.1 (0-33.3); T6: 11.1 (0-33.3); T7: 27.8 (0-33.3); T8: 0 (0-33.3)	T1: 0 (0-33.3); T2: 0 (0-33.3); T3: 0 (0-33.3); T4: 0 (0-33.3); T5: 0 (0-33.3); T6: 11.1 (0-33.3); T7: 0 (0-16.7); T8: 0 (0-0)	T1: 0 (0-0); T2: 0 (0-0); T3: 0 (0-0); T4: 0 (0-0); T5: 0 (0-0); T6: 0 (0-0); T7: 0 (0-0); T8: 0 (0-0)	T1: 0 (0-0); T2: 0 (0-0); T3: 0 (0-0); T4: 0 (0-0); T5: 0 (0-0); T6: 0 (0-0); T7: 0 (0-0); T8: 11.1 (0-0)	T1: 0 (0-33.3); T2: 0 (0-33.3); T3: 16.7 (0-33.3); T4: 0 (0-33.3); T5: 33.3 (0-33.3); T6: 16.7 (0-33.3); T7: 33.3 (0-33.3); T8: 33.3 (0-33.3)
Author and year	EORTC QLQ-BN20
	Future uncertainty	Visual disorder	Motor dysfunction	Communication deficit	Headache	Seizures	Drowsiness	Hair loss	Itchy skin	Leg weakness	Bladder control
Aaronson (2011); Boele (2014); Boele (2015); Ediebah (2017)a	T1: 24.1 (22.7), T2: 28.09 (21.99)	T1: 14.7 (21.5), T2: 14.87 (21)	T1: 13.3 (18), T2: 13.02 (15.66)	T1: 23.5 (24), T2: 20.34 (22.1)	T1: 21.13, T2: 25.64 (26.85)	T1: 13.81, T2: 16.15 (27.85)	T1: 17.26, T2: 23.08 (24.95)	T1: 7.81, T2: 4.1 (12.51)	T1: 9.01, T2: 13.33 (24.15)	T1: 4.46, T2: 8.21 (20.44)	T1: 5.95, T2: 8.72 (17.95)
Budrukkar (2009)	17.9 (21.2), HGG: 23.1 (23.1), Benign: 16.8 (13.8)	17.6 (18.3), HGG: 20.7 (21.5), Benign: 14.6 (16.4)	25.7 (21.6), HGG: 32.9 (24.3), Benign: 25.1 (19.3)	28.9 (25.2), HGG: 34.9 (27.8), Benign: 25.5 (22.9)	21.6 (22.6), HGG: 24.5 (28.1), Benign: 15 (20.4)	27.1 (29.9), HGG: 38.2 (32), Benign: 23.5 (28.5)	12.3 (22.2), HGG: 18.5 (29.3), Benign: 17.4 (23.8)	15.5 (25.1), HGG: 21.1 (33.3), Benign: 11.1 (22.7)	2.9 (9.4), HGG: 5.6 (18.6), Benign: 1.9 (7.9)	NR	NR
Jakola (2012)	23	12	22	20	NR	NR	NR	NR	NR	NR	NR
Mahalakshmi (2015)	21.2 (19.1); HGG: 25.2 (15.2)	16.7 (18.3); HGG: 22.1 (21.5)	22.9 (21.6); HGG: 38.7 (24.3)	22.1 (26.2); HGG: 38.9 (26.4)	19.6 (22.6); HGG: 22.5 (24.1)	18.4 (22.2); HGG: 21.5 (29.3)	15.5 (25.1); HGG: 21.1 (33.3)	12.8 (29.9); HGG: 32.2 (32)	2.45 (9.4); HGG: 6.21 (18.6)	NR	NR
Okita (2015)g	G1: 27.4 (24); G2: 16.7 (20.8); G3: 19.2 (18.5)	G1: 7.4 (14.2); G2: 8.8 (21.5); G3: 8.9 (12.6)	G1: 12.2 (18.2); G2: 10.5 (16.3); G3: 10 (11.1)	G1: 16.4 (28); G2: 15.8 (22.6); G3: 27.8 (30.2)	G1: 20.6 (22.3); G2: 12.3 (16.5); G3: 13.3 (17.2)	G1: 3.2 (10); G2: 1.8 (7.7); G3: 3.3 (10.5)	G1: 31.8 (32.5); G2: 28.1 (31.9); G3: 40 (30.6)	G1: 7.9 (18); G2: 8.8 (18.7); G3: 10 (31.6)	G1: 12.7 (26.8); G2: 8.8 (18.7); G3: 3.3 (10.5)	G1: 11.1 (26.5); G2: 17.5 (23.2); G3: 30 (39.9)	G1: 3.2 (10); G2: 15.8 (32.1); G3: 26.7 (34.4)
Reijneveld (2001)k	21.5; S-LGG: 24.5	10.5; S-LGG: 6.5	15; S-LGG: 3.5	20.5; S-LGG: 14	23; S-LGG: 29	25.5; S-LGG: 15.5	18.5; S-LGG: 14	4.5; S-LGG: 4.5	8.5; S-LGG: 10	4.5; S-LGG: 1.5	8.5; S-LGG: 0
Umezaki (2020)	24.5; HGG: 28.7	10.4; HGG: 13.1	15.9; HGG: 12.8	19.3; HGG: 29.4	18.3; HGG: 14.8	7.5; HGG: 1.5	32.2; HGG: 39.3	10.7; HGG: 24.4	9.7; HGG: 20.7	25.8; HGG: 28.9	8.6; HGG: 13.3
Yavas (2012)i, j	T1: 16.7 (8.3-25); T2: 16.7 (0-25); T3: 16.7 (0-25); T4: 16.7 (0-25); T5: 8.3 (0-16.7); T6: 8.3 (0-16.7); T7: 11.1 (0-18.7); T8: 0 (0-20.8)	T1: 0 (0-0); T2: 0 (0-0); T3: 0 (0-0); T4: 0 (0-0); T5: 0 (0-0); T6: 0 (0-0); T7: 0 (0-0); T8: 0 (0-0)	T1: 0 (0-11.1); T2: 0 (0-11.1); T3: 0 (0-11.1); T4: 0 (0-0); T5: 0 (0-0); T6: 0 (0-0); T7: 0 (0-0); T8: 0 (0-0)	T1: 11.1 (0-22.2); T2: 11.1 (0-22.2); T3: 5.5 (0-22.2); T4: 0 (0-11.1); T5: 0 (0-11.1); T6: 0 (0-11.1); T7: 0 (0-11.1); T8: 0 (0-11.1)	T1: 33.3 (0-33.3); T2: 0 (0-33.3); T3: 0 (0-33.3); T4: 0 (0-33.3); T5: 0 (0-0); T6: 0 (0-0); T7: 0 (0-2.8); T8: 0 (0-0)	T1: 0 (0-33.3); T2: 0 (0-33.3); T3: 0 (0-0); T4: 0 (0-11.1); T5: 0 (0-0); T6: 0 (0-11.1); T7: 0 (0-11.1); T8: 0 (0-0)	T1: 33.3 (0-33.3); T2: 33.3 (0-33.3); T3: 0 (0-33.3); T4: 0 (0-0); T5: 0 (0-33.3); T6: 0 (0-0); T7: 0 (0-24.9); T8: 0 (0-0)	T1: 0 (0-0); T2: 33.3 (0-33.3); T3: 33.3 (0-33.3); T4: 0 (0-33.3); T5: 0 (0-33.3); T6: 0 (0-0); T7: 0 (0-0); T8: 0 (0-0)	T1: 0 (0-33.3); T2: 0 (0-0); T3: 0 (0-0); T4: 0 (0-0); T5: 0 (0-0); T6: 0 (0-0); T7: 0 (0-0); T8: 0 (0-0)	T1: 0 (0-0); T2: 0 (0-0); T3: 0 (0-0); T4: 0 (0-0); T5: 0 (0-0); T6: 0 (0-0); T7: 0 (0-0); T8: 0 (0-0)	T1: 0 (0-0); T2: 0 (0-0); T3: 0 (0-0); T4: 0 (0-0); T5: 0 (0-0); T6: 0 (0-0); T7: 0 (0-0); T8: 0 (0-0)
Author and year	FACT-Br
	Physical wellbeing	Social/family wellbeing	Emotional wellbeing	Functional wellbeing	Brain cancer subscale	Total
Affronti (2018)b	T1: 21.95 (5.10) T2:23.07 (4.07) T3: 22.73 (6.50)	T1: 20.81 (5.17) T2: 20.88 (4.72) T3: 19.22 (4.66)	T1: 17.20 (5.5) T2: 15.64 (4.96) T3: 17.87 (5.36)	T1: 15.8 (6.65) T2: 16.29 (5.95) T3: 16.73 (6.86)	T1: 50.29 (14.58) T2: 49.96 (16.10) T3: 53.53 (16.59)	T1: 126.05 (31.8) T2: 125.84 (29.52) T3: 130.09 (35.62)
Correa (2007); Correa (2008)c	NR	NR	NR	NR	NR	T1: Treated - 145 (25.6), Untreated - 142 (25.3); T2: NR; T3: NR
Wang (2018); Li (2019a); Li (2019b)h	T1: 20.94 (4.32); T2: 20.99 (4.17)	T1: 23.36 (3.6); T2: 23.49 (3.59)	T1: 17.7 (3.73); T2: 18.97 (3.21)	T1: 17.27 (4.25); T2: 18.65 (3.55)	T1: 54.15 (11.22); T2: 56.52 (9.16)	T1: 133.57 (16.24); T2: 138.62 (13.37)
Author and year	Otherm
	Physical	Psychological	Social	Emotional	Cognitive	Role	Other	Total
Affronti (2018)b	NR	NR	NR	NR	FACT-Cog: Perceived cognitive impairments: T1: 49.8 (18.04), T2: 48.64 (12.63), T3: 46.2 (19.27); Impact of perceived cog: T1: 8.33 (4.61), T2: 8.36 (4.43), T3: 9.13 (4.97); Comments from others: T1: 12.67 (4.7), T2: 13.71 (3.41), T3: 13.8 (4.31); Perceived cognitive abilities: T1: 15.73 (7.68), T2: 14.57 (6.66), T3: 15.53 (7.74)	NR	FACIT-Fatigue: T1: 30.67 (13.26) T2: 32.14 (12.02) T3: 34.47 (12.74)	NR
Campanella (2017)	NR	NRo	NR	NR	NR	NR	NR	NR
Drewes (2018)d	NR	NR	NR	NR	NR	NR	NR	EQ-5D: T1: 0.76 (0.03-0.1), HGG: 0.76 (-0.48-1.0); T2: 0.73 (0.1-1.0), HGG: 0.76 (-0.2-1.0); T3: 0.78 (-0.1-1.0), HGG: 0.38 (-0.43-1.0)
Gabel (2019)	PROMIS: function: 47.7 (12.2), HGG: 41.8 (12.6); pain interferences: 52.8 (10.4), HGG: 49.3 (9.8); pain intensity: 3.3 (3), HGG: 1.8 (2)	PROMIS: anxiety: 51.5 (8.8), HGG: 54.3 (10.4); depression: 47.2 (11.4), HGG: 49.1 (10)	PROMIS: ability to participate in social role and activities: 50.7(10.4); HGG: 47.2 (11.4)	Neuro-QoL: emotional and behavioural dyscontrol: 46.9 (12.8); HGG: 46.7 (9.9)	Neuro-QoL: 47.9 (9.3); HGG: 44 (11.6)	See social	PROMIS: fatigue: 50.2 (10.2), HGG: 51.3 (10.6); sleep disturbances: 53.2 (9), HGG: 52.01 (9.2)	NR
Jakola (2012)	NR	NR	NR	NR	NR	NR	NR	EQ-5D: Non-eloquent: 0.76, Eloquent: 0.74
Kim (2020)	NRn	NR	NRn	NRn	NR	NRn	NR	FACT-G: Grade I: 71.44 (17.18), II: 72.84 (17.92), III: 73.02 (17.59), IV: 48.93 (18.29)
Salo (2002); Mainio (2006)	NR	NR	NR	NR	NR	NR	NHP: Sleep: 6.9	15D: T1: 0.88 T2: 0.91 T3: 0.89
Abbreviations: G = group; HGG = high-grade glioma; L = level; NCC = non-cancer control; NHL/CLL = non-Hodgkin's lymphoma/chronic lymphocytic leukaemia; NR = Not reported; PTSD = post-traumatic stress disorder; S-LGG = suspected low-grade glioma; T = timepoint
aT1 = mean 6 years, T2 = mean 12 years since diagnosis
bT1 = 2 months, T2 = 4 months, T3 = 6 months since diagnosis
cT1 = baseline, T2 = 6 months, T3 = 12 months follow-up
dT1 = 1 month, T2 = 6 months since treatment
eSample stratified into six levels of epilepsy burden (level 1 = epilepsy free – level 6 = >6 seizures in the last year)
fT0 = 1-week before surgery, T1 = 1-month, T2 = 3-months, T3 = 6-months, T4 = 12-months since surgery
gG1 = 0-4 years, G2 = 5-9 years, G3 = 10-20 years since treatment
hT1 = 1 month, T2 = 1 year since treatment
iT1 = baseline, T2 = 1-3 months, T3 = 6 months, T4 = 12 months, T5 = 18 months, T6 = 24 months, T7 = 30 months, T8 = 36 months since treatment
jFindings reported as medians and inter-quartile ranges
kMean results interpreted from figures.
lReported as prevalence of people with low scores (one SD below average score of control group)
mOther instruments: EQ-5D; FACIT-fatigue; FACT-Cog; SQoL; NIH-PROMIS; NeuroQoL; Sin-Tonen’s 15D.
nFindings not reported separately for LGGs.
oFindings reported as Z values, so raw scores were not available.
